# Supplementary material
Source: ML conference proceedings conference paper supplement (https://proceedings.mlr.press/v97/doerr19a.html)
Supplement: Supplementary file 1 [file doerr19a-supp.pdf]

---

# Supplementary Material to Trajectory-Based Off-Policy Deep RL

---

Anonymous Authors<sup>1</sup>

## A. Proof of Proposition 1

The weighted importance sampling estimator of the expected cost is given by

$$\hat{j}^{\text{WIS}}(\theta) = \frac{1}{\sum_{i=0}^M w(\tau_i, \theta)} \sum_{i=0}^M w(\tau_i, \theta) R(\tau_i), \quad (1)$$

as derived in Sec. 3. Taking the derivative with respect to the policy parameters, we obtain the policy gradient formulation from theorem 1 as shown in (7).

## B. Experimental Details

In the following section, details about the reference implementations of REINFORCE, TRPO and PPO and their parameter settings are summarized for the benchmark experiments and the ablation study. Information about the benchmark environments is given in Sec. B.2

### B.1. Algorithm Configurations

The reference implementations of the benchmark algorithms REINFORCE, TRPO and PPO are from the Garage RL framework (Duan et al., 2016). A hyper-parameter grid search has been conducted for each algorithm and each environment on separate random seeds. The parameter ranges and selected hyper-parameters are indicated in Tab. 1. For the benchmark itself, ten runs have been conducted for each algorithm and each environment on the random seeds (404, 931, 159, 380, 858, 708, 16, 448, 136, 989).

The configuration of the DD-OPG method is summarized in Tab. 1.

### B.2. Benchmark Environments

The benchmark environments are cartpole, mountaincar and swimmer from the Garage RL framework. Details about the input and state dimensions, as well as the task horizons are listed in Tab. 2.

## References

Duan, Y., Chen, X., Houthoofd, R., Schulman, J., and Abbeel, P. Benchmarking deep reinforcement learning

Table 1. Algorithm hyper-parameters for the benchmark tasks.

| ALGORITHM | PARAMETER  | RANGE         | SELECTED |
|-----------|------------|---------------|----------|
| REINFORCE | BATCH SIZE | [400, 5000]   | 5000     |
|           | STEP SIZE  | [0.0001, 0.1] | 0.03     |
| TRPO      | BATCH SIZE | [400, 5000]   | 5000     |
|           | STEP SIZE  | [0.0001, 0.1] | 0.1      |
| PPO       | BATCH SIZE | [400, 5000]   | 2000     |
|           | STEP SIZE  | [0.0001, 0.2] | 0.2      |

---

| ALGORITHM | PARAMETER   | SYMBOL        | SELECTED |
|-----------|-------------|---------------|----------|
| DD-OPG    | TEMPERATURE | $\lambda$     | 0.1      |
|           | PENALTY     | $\gamma$      | 0.05     |
|           | LENGTHSCALE | $\log \Sigma$ | 3I       |
|           | PATH BUFFER | $N_{max}$     | 50       |

Table 2. Information about the benchmark environments.

| ENVIRONMENT | INPUTS | STATES | HORIZON |
|-------------|--------|--------|---------|
| CARTPOLE    | 1      | 4      | 100     |
| MOUNTAINCAR | 1      | 2      | 500     |
| SWIMMER     | 2      | 13     | 1000    |

for continuous control. In *International Conference on Machine Learning (ICML)*, pp. 1329–1338, 2016.

Figure 1. Derivation of the weighted IS policy gradient.

$$\begin{aligned} \nabla_{\theta} \hat{J}^{\text{WIS}}(\theta) &= \nabla_{\theta} \left( \left( \sum_{i=1}^N \frac{p(\tau_i | \theta)}{\frac{1}{N} \sum_j p(\tau_i | \theta_j)} \right)^{-1} \right) \sum_{i=0}^N \frac{p(\tau_i | \theta)}{\frac{1}{N} \sum_j p(\tau_i | \theta_j)} R(\tau_i) + \\ &\quad \left( \sum_{i=1}^N \frac{p(\tau_i | \theta)}{\frac{1}{N} \sum_j p(\tau_i | \theta_j)} \right)^{-1} \sum_{i=0}^N \nabla_{\theta} \left( \frac{p(\tau_i | \theta)}{\frac{1}{N} \sum_j p(\tau_i | \theta_j)} R(\tau_i) \right) \end{aligned} \quad (2)$$

$$\begin{aligned} &= - \left( \sum_{i=1}^N w_i(\theta) \right)^{-2} \left( \sum_{i=1}^N \nabla_{\theta} w_i(\theta) \right) \left( \sum_{i=1}^N w_i(\theta) R(\tau_i) \right) + \\ &\quad \left( \sum_{i=1}^N w_i(\theta) \right)^{-1} \left( \sum_{i=1}^N \nabla_{\theta} w_i(\theta) R(\tau_i) \right) \end{aligned} \quad (3)$$

$$= -\frac{1}{Z^2} \left( \sum_{i=1}^N \nabla_{\theta} w_i(\theta) \right) \left( \sum_{i=1}^N w_i(\theta) R(\tau_i) \right) + \frac{1}{Z} \left( \sum_{i=1}^N \nabla_{\theta} w_i(\theta) R(\tau_i) \right) \quad (4)$$

$$= \frac{1}{Z} \left( \sum_{i=1}^N \nabla_{\theta} w_i(\theta) R(\tau_i) - \sum_{i=1}^N \nabla_{\theta} w_i(\theta) \frac{\sum_{i=1}^N w_i(\theta) R(\tau_i)}{Z} \right) \quad (5)$$

$$= \frac{1}{Z} \left( \sum_{i=1}^N \nabla_{\theta} w_i(\theta) R(\tau_i) - \sum_{i=1}^N \nabla_{\theta} w_i(\theta) \hat{J}^{\text{WIS}}(\theta) \right) \quad (6)$$

$$\nabla_{\theta} \hat{J}^{\text{WIS}}(\theta) = \frac{1}{Z} \sum_{i=1}^N \nabla_{\theta} w_i(\theta) \left( R(\tau_i) - \hat{J}^{\text{WIS}}(\theta) \right) \quad (7)$$

055  
056  
057  
058  
059  
060  
061  
062  
063  
064  
065  
066  
067  
068  
069  
070  
071  
072  
073  
074  
075  
076  
077  
078  
079  
080  
081  
082  
083  
084  
085  
086  
087  
088  
089  
090  
091  
092  
093  
094  
095  
096  
097  
098  
099  
100  
101  
102  
103  
104  
105  
106  
107  
108  
109
